# Supplementary material
Source: PubMed Central journal article supplement (PMC3210334)

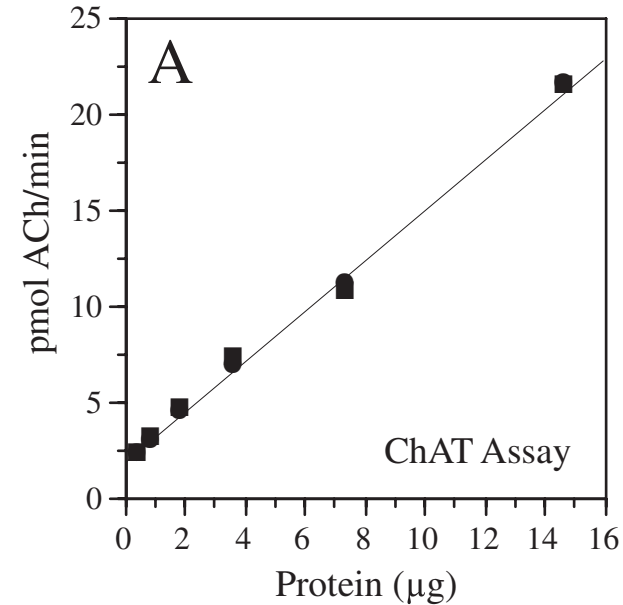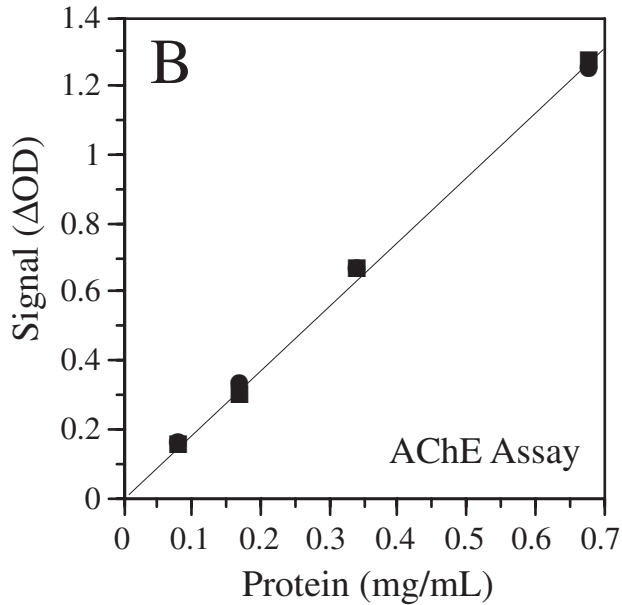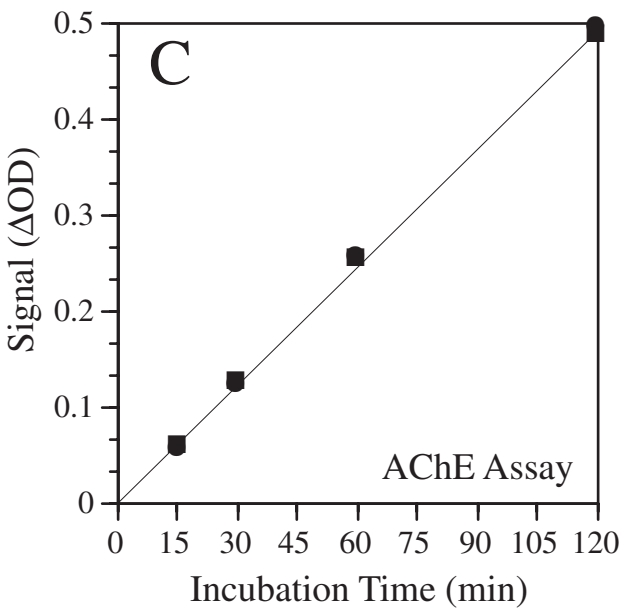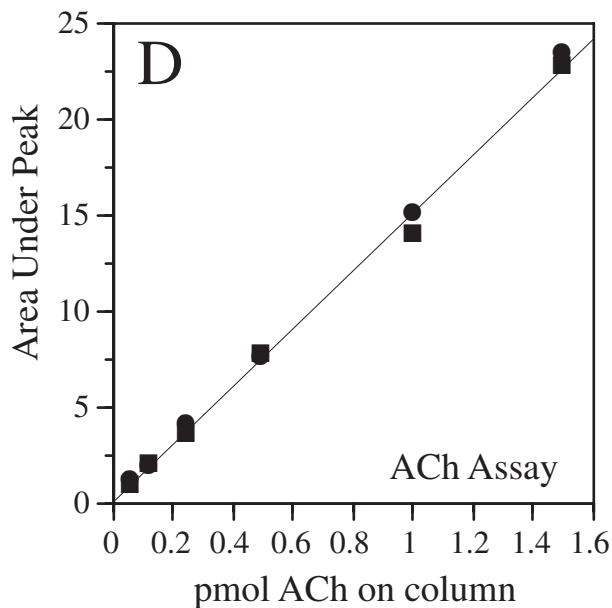

Supplement: NIHMS325407-supplement-01.pdf [file NIHMS325407-supplement-01.pdf]

Incorrect Responses

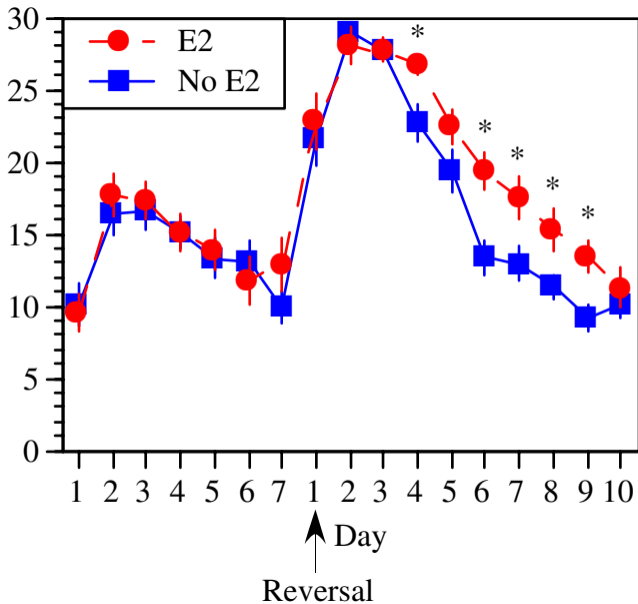

Supplement: NIHMS325407-supplement-02.pdf [file NIHMS325407-supplement-02.pdf]
